# Supplementary material
Source: Springer Nature journal article supplement (https://www.springermedizin.de/resource/supplementary/12936_2012_2487_MOESM5_ESM.pdf/9542680)

(A)

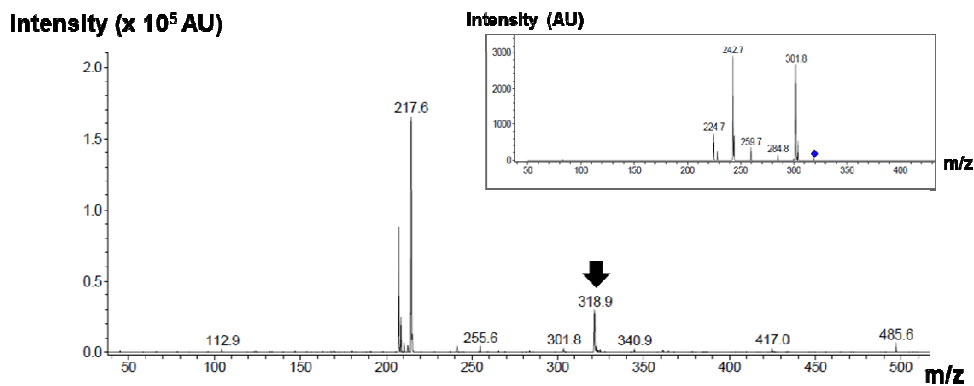

(B)

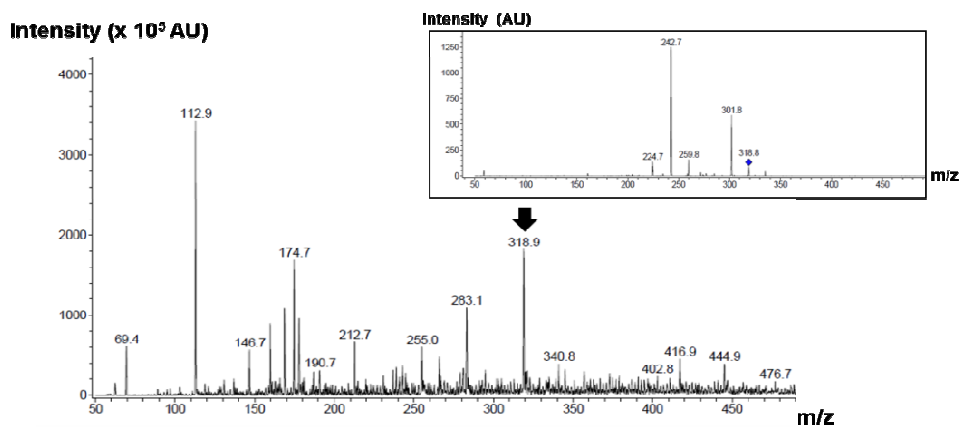

(C) PLP-thiosemicarbazone (MW = 320.28)

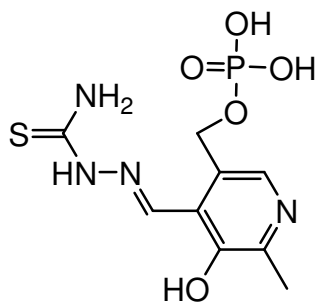

Supplement: MOESM5 [file 9542680]
